# Supplementary material
Source: MDPI journal article supplement (https://www.mdpi.com/1999-4907/14/4/687)
Supplement: s1 [file s1 › forests-2289602-supplementary.pdf]

## **INTERVIEW QUESTIONNAIRE**

### **I. Socio-demographic profile of the respondent**

- Village:.....
- Geographic coordinates: .....
- Name of respondent: .....
- Age: .....
- Gender: .....
- Seniority in the village: .....
- Level of education: 1. Primary school level 2. Secondary school level 3. University level 4. none
- Main activities : 1. Cultivator 2. Charcoal producer 3. Art sculptor 4. Logger of timber 5. NTFPs Collector

### **II. Questions about forest management**

#### **a. By ONGs**

1. What are the main environmental issues in your village area?
2. Could you arrange them (problems) in order of severity?
3. Which NGOs carry out forest resource management activities in your village?
4. What are the concrete activities that each of the NGOs listed is carrying out in relation to forest management in your village? (Note the details of the different activities).
5. Do you participate in the activities carried out by each of the NGOs mentioned?
6. If **yes**, which activities have you participated in and what was your role in each activity?
7. If **no**, what are the reasons for not participating in these different activities?

#### **b. By provincial public services**

8. Which provincial public services carry out forest resource management activities in your village?
9. What are the concrete activities that each of the provincial public services listed is carrying out in relation to forest management in your village? (Note the details of the different activities).
10. Do you participate in the activities carried out by each of those provincial public services mentioned?
11. If **yes**, which activities have you participated in and what was your role in each activity?
12. If **no**, what are the reasons for not participating in these different activities?

#### **c. Other**

13. Do you have any comments or suggestions regarding forest management for involvement of local community?
